**Full Title:** *Candida albicans* white and opaque cells exhibit distinct spectra of organ colonization in mouse models of infection

**Short Title:** *C. albicans* white and opaque cells exhibit distinct spectra of organ colonization

**Author/Affiliations:** Julie Takagi<sup>1\*</sup>, Sheena D. Singh-Babak<sup>1</sup>, Matthew B. Lohse<sup>1</sup>, Chiraj K. Dalal<sup>1#</sup> & Alexander D. Johnson<sup>1,2#</sup>

<sup>1</sup>Department of Microbiology and Immunology, University of California, San Francisco, 600 16 Street, San Francisco, CA 94158, USA

<sup>2</sup>Department of Biochemistry and Biophysics, University of California, San Francisco, 600 16<sup>th</sup> Street, San Francisco, CA 94158, USA

\*Current Address:

Department of Biology, Massachusetts Institute of Technology, 77 Massachusetts Avenue, Cambridge, MA 02139, USA

#Correspondence: [ajohnson@cgl.ucsf.edu](mailto:ajohnson@cgl.ucsf.edu)  
[chirajdalal.ucsf@gmail.com](mailto:chirajdalal.ucsf@gmail.com)

## Abstract

1           *Candida albicans*, a species of fungi, can thrive in diverse niches of its  
2 mammalian hosts; it is a normal resident of the GI tract and mucosal surfaces but it  
3 can also enter the bloodstream and colonize internal organs causing serious  
4 disease. The ability of *C. albicans* to thrive in these different host environments has  
5 been attributed, at least in part, to its ability to assume different morphological  
6 forms. In this work, we examine one such morphological change known as white-  
7 opaque switching. White cells are the default state of *C. albicans*, and most animal  
8 studies have been carried out exclusively with white cells. Here, we compared the  
9 proliferation of white and opaque cells in two murine models of infection and also  
10 monitored, using specially constructed strains, switching between the two states in  
11 the host. We found that white cells outcompeted opaque cells in many niches;  
12 however, we show for the first time that in some organs (specifically, the heart and  
13 spleen), opaque cells competed favorably with white cells and, when injected on  
14 their own, could colonize these organs. In environments where the introduced white  
15 cells outcompeted the introduced opaque cells, we observed high rates of opaque-  
16 to-white switching. We did not observe white-to-opaque switching in any of the  
17 niches we examined.

## 18 Introduction

19           *Candida albicans* is a source of serious fungal infections in the United  
20 States; it is the fourth most commonly cultured microbe from blood (Pfaller and  
21 Diekema, 2007). Unlike other major fungal pathogens, *C. albicans* is also a part of  
22 the normal human microbiome, particularly in the gastrointestinal tract, skin, oral

23 cavity, and other mucosal surfaces (Odds, 1988). As a pathogen, *C. albicans* poses  
24 health risks, particularly for people whose immune system is suppressed, who have  
25 surgeries, implanted medical devices, or who have been treated with long courses  
26 of antibiotics. The attributable mortality from *C. albicans* bloodstream infections in  
27 adults is at least 15% and has been reported to be as high as 40% (Zaoutis et al.,  
28 2005).

29         While some human fungal pathogens exist primarily as budding yeast cells  
30 (for example, *Cryptococcus neoformans* (Buchanan, 1998)) or filamentous hyphal  
31 structures (for example, *Aspergillus* spp. (Baker and Bennett, 2007)), *C. albicans*  
32 alternates between these and other morphologies, often in response to specific  
33 environmental cues. In this paper, we explore the switch *C. albicans* makes from its  
34 normal, round-to-oval yeast cell morphology (white) to an elongated, mating  
35 competent cell type termed opaque (for reviews see Lohse and Johnson, 2009; Soll  
36 et al., 2009). White-opaque switching is unusual in that it is a heritable change, one  
37 that occurs without a change in the DNA sequence of the genome. In standard  
38 laboratory media, switching occurs rarely, approximately once every  $10^4$  cell  
39 divisions (Slutsky et al., 1987; Soll et al., 1993); therefore, each cell type is  
40 accurately maintained across many cycles of cell division. Approximately one-sixth  
41 of all genes (of ~6000 total) are differentially regulated (at least two-fold) between  
42 the two cell types (Lan et al., 2002; Tuch et al., 2010). These expression  
43 differences involve many types of genes, including those responsible for the ability  
44 of opaque cells (but not white cells) to mate, consistent with the observation that  
45 opaque cells are specialized for mating (Miller and Johnson, 2002; Tsong et al.,

46 2003). The complete set of differentially regulated genes also encodes a variety of  
47 metabolic enzymes, suggesting that white and opaque cells are each ‘metabolically  
48 specialized’ to thrive in specific niches (reviewed in Huang, 2012; Lohse and  
49 Johnson, 2009; Morschhäuser, 2010; Soll, 2014, 1992, 2004). Supporting this  
50 hypothesis, environmental factors such as temperature, carbon source, and oxygen  
51 can significantly alter the switching rate between cell-types (Ene et al., 2016; Huang  
52 et al., 2009, 2010; Rikkerink et al., 1988). Another difference between white and  
53 opaque cells lies in their recognition by macrophages and neutrophils, indicating  
54 that the white-opaque switch may play a role in evading the host innate immune  
55 system response and in colonizing internal environments (Geiger et al., 2004;  
56 Kolotila and Diamond, 1990; Kvaal et al., 1999, 1997; Lohse and Johnson, 2008;  
57 Sasse et al., 2013). Taken as a group, these observations point to the hypothesis  
58 that white-opaque switching evolved during *C. albicans*' long association with its  
59 warm-blooded host and plays a crucial role in the pathogen-host relationship.  
60 Consistent with this hypothesis, deletion of the master regulator of white-opaque  
61 switching (*Wor1*) impairs the ability of *C. albicans* to survive in a mouse  
62 gastrointestinal model of colonization (Pande et al., 2013). Although not all clinically  
63 isolated strains of *C. albicans* readily undergo white-opaque switching, many do so.  
64 Even “non-switching” clinical strains can be converted to switching strains by simple  
65 mutation, indicating that the complex mechanism underlying switching and the  
66 specification of the two cell types are deeply conserved traits. Also consistent with  
67 this hypothesis is the observation that two pathogenic fungi closely related to *C.*

68 *albicans* (*Candida dubliniensis* and *Candida tropicalis*) also undergo white-opaque  
69 switching (Porman et al., 2013; Pujol et al., 2004).

70 To systematically investigate the behavior of white and opaque cells *in vivo*,  
71 genetically identical strains of white and opaque cells were tagged with spectrally  
72 distinct fluorophores and co-inoculated into rodent models of infection and  
73 colonization. Historically, these animal models have been optimized for white cells,  
74 and in this study, we varied the dosage and timing to better capture the behavior of  
75 opaque cells. We found, using variations of the tail-vein injection model (Odds et  
76 al., 2000), that both white and opaque cells are capable of disseminating from the  
77 bloodstream into multiple organs; in some organs, white cells significantly  
78 outcompete opaque cells, but in others, they are roughly equivalent. In gut models  
79 of colonization (Rosenbach et al., 2010), with and without antibiotic treatment, long-  
80 term colonization by cells introduced as opaque cells depends on their switching to  
81 white cells.

## 82 **Results:**

### 83 **Fluorescent markers enable unbiased comparison of** 84 **white and opaque cells *in vivo***

85 In order to develop a quantitative, reproducible approach to observe the  
86 relative colonization of white and opaque cells *in vivo*, we constructed fluorescently  
87 tagged white and opaque strains of *C. albicans*. These strains were matched  
88 genetically, except for a single locus where the Tef2 protein was C-terminally  
89 tagged with either GFP or mCherry, two spectrally distinct fluorophores. We  
90 employed experiments with a plate reader to validate that tagging white and opaque

91 cells with fluorophores did not affect their growth (Figure S1, Materials and  
92 Methods, Dataset 1). These strains were then introduced together (in 50:50 mixes)  
93 to mice via tail-vein injection or oral gavage; after the mice were sacrificed, *C.*  
94 *albicans* cells were harvested and immediately plated at 25°C. After seven days of  
95 growth, we scored colonies (based on their colony morphology) as white or opaque  
96 to determine the state of each cell at the point the mice were sacrificed. (At 25°C on  
97 plates, very little switching occurs, so the appearance of a given colony reflected  
98 the identity of the single cell that produced it.) Using a fluorescent  
99 stereomicroscope, we also determined whether each colony expressed GFP or  
100 mCherry. In this way, we were able to determine whether a given cell was injected  
101 as a white or opaque cell and whether it remained as the same cell type or  
102 underwent a switch to the other cell type. We validated this approach by plating  
103 mixtures of white and opaque cells with known ratios; we were able to recover the  
104 expected ratio of colonies on plates (Figure S2, Materials and Methods, Dataset 2).  
105 Hence, this approach offers several advantages when compared with previous  
106 studies: 1) it does not require the use of auxotrophies or drug resistance markers  
107 that have been shown to affect *C. albicans* behavior *in vivo* (Bain et al., 2001; Lay  
108 et al., 1998), 2) it does not require the use of strains that are artificially “locked” in  
109 one cell-type or another, for example by deleting or overexpressing the master  
110 regulator *Wor1* (Huang et al., 2006; Pande et al., 2013; Zordan et al., 2006), and 3)  
111 it does not require any downstream processing, such as qPCR, which can introduce  
112 errors through amplification. Finally, because white and opaque cells were injected

113 together, this approach enabled us to directly compare colonization, proliferation,  
114 and switching of white and opaque cells *in vivo*.

115 To test whether the fluorophores introduced any bias *in vivo*, the tail veins of  
116 four Balb/C mice (18-20g) were injected with  $2.2 \times 10^6$  white cells, half of which were  
117 tagged with GFP and the other half with mCherry. The mice were sacrificed after 24  
118 hours and the fungal burden in five organs (the kidney, liver, spleen, heart, and  
119 brain) was analyzed (Figure 1a). Across all five organs, the distributions of mCherry  
120 and GFP-tagged colonies were not significantly different (p-values all  $>0.05$ ,  
121 Wilcoxon matched-pairs signed rank test, Figure 1, Dataset 3), indicating that the  
122 fluorophores themselves introduce little or no bias *in vivo*.

## 123 **Opaque cells can disseminate from the bloodstream into** 124 **many organs**

125 To compare the relative colonization of white and opaque cells in a systemic  
126 model of infection, white-mCherry and opaque-GFP cells were co-injected (at a  
127 50:50 ratio) into the tail vein of four mice each at two inocula:  $8 \times 10^5$  and  $1.6 \times 10^6$   
128 cells (Figure 2a). After 24 hours, the mice were euthanized and their organs  
129 harvested and processed. Both white and opaque cells were present in all five  
130 organs (as indicated by the colony counts) and were at a higher density in the mice  
131 with the higher inoculum (Figure 2, Dataset 4). A comparison of the white and  
132 opaque cells across the five organs showed different distributions depending on the  
133 organ (Figure 2, Dataset 4). The most pronounced difference was observed in the  
134 kidney, where white cells greatly outnumbered opaque cells in every mouse  
135 examined (p-value = 0.0078, Wilcoxon matched-pairs signed rank test, Figure 2b,  
136 Dataset 4). Of the white cells recovered from the kidney, 70% had been injected as

137 white cells; the remaining 30% had been initially injected as opaque cells but had  
138 switched to white cells. The situation in the heart and spleen was different; here,  
139 opaque cells outnumbered white cells (p-value 0.0156, Wilcoxon matched-pairs  
140 signed rank test, Figure 2d, 2e Dataset 4). In the heart, virtually none of the cells  
141 had switched in either direction; in the spleen, a small fraction of the white cells  
142 recovered had been injected as opaque cells. Finally, in the liver and brain, both  
143 white and opaque cells were recovered with a slight preference for white cells  
144 (Figure 2c, 2f). Because of significant mouse-to-mouse variation (particularly in the  
145 liver), we do not feel confident that this preference is biologically meaningful even  
146 though it is statistically significant (p-values =0.0078, Wilcoxon matched-pairs  
147 signed rank test, Figure 2c, 2f, Dataset 4). Rather, we view the colonization of white  
148 and opaque cells in these organs as roughly equivalent. We do note that, of the  
149 white cells recovered from the brain, a significant fraction had been initially injected  
150 as opaque cells.

151 As described above, our observations document a significant level of  
152 opaque-to-white switching that occurred *in vivo*. We do not know when, during the  
153 course of the infection, this switching occurred; however, we suspect it happened  
154 after the injected cells entered the different organs. Had the opaque cells switched  
155 in the bloodstream immediately following injection, we would have expected to  
156 observe similar opaque-to-white switching patterns across all organs tested, and  
157 this was not the case. We also note that we did not observe any opaque-mCherry  
158 colonies (in any organ, in any mouse, and at any inoculum, >1000 colony-forming



159 units visually inspected), indicating that stable switching from white cells to opaque  
160 cells must be rare, below the detection limit of the mouse models we examined.

161 Finally, our data show that in this experiment (Figure 2), mice were  
162 inoculated with more white than opaque cells (2:1 white:opaque ratio, see Dataset 4  
163 for raw data). We find that this did not affect strain competition *in vivo* since (1) we  
164 found instances (for example, the heart and spleen) where opaque cells grew well,  
165 even when they were underrepresented in the inoculum, and (2) this experiment  
166 was conducted at two inoculums (Figure 2, Dataset 4) and the trends from both  
167 inoculums were the same suggesting that changing the absolute number of either  
168 white or opaque cells had no bearing on the relative colonization of different organs.

169 To test whether the colonization by opaque cells was dependent on co-  
170 injection with white cells, we injected the tail veins of four additional mice with a  
171 50:50 mixture of opaque-mCherry and opaque-GFP inoculum ( $1.6 \times 10^6$  cells) and  
172 measured colonization in the kidney, spleen, liver, brain, and heart (Figure S3,  
173 Dataset 4). We observed opaque cell colonization of all five organs (Figure S3,  
174 Dataset 4), indicating that a large white cell population was not needed to “aid” the  
175 opaque cells in colonization.

176 Taken together, these results show that opaque cells are capable of  
177 efficiently colonizing and proliferating in numerous niches *in vivo*, and in some  
178 cases (heart and spleen) somewhat better than white cells. However, opaque cells  
179 are severely outcompeted by white cells in the kidney, the organ that is typically  
180 used to assess systemic fungal infection in murine models.

181 ***C. albicans* cells that persist for long times during**  
182 **systemic infection are predominantly white**

183           In the previous experiments, we used a relatively large inocula of *C. albicans*  
184 and sacrificed the mice after 24 hours. In the next set of experiments, we compared  
185 white and opaque cells in a longer-term infection model initiated with a lower  
186 inoculum. This model is the standard systemic model of fungal infection (Noble et  
187 al., 2010; Odds et al., 2000; Perez et al., 2013). Seven mice were infected with  
188  $5 \times 10^5$  cells containing an approximately equal number of white-mCherry and  
189 opaque-GFP cells. Mice were sacrificed upon signs of sickness (occurring between  
190 7 and 14 days after injection) and fungal burden was assessed across the five  
191 organs as described above (Figure 3a). In this experiment, *C. albicans* cells were  
192 recovered reproducibly only from the kidney; either the *Candida* cells were cleared  
193 from the other organs or the inoculum was sufficiently low that *Candida* did not  
194 efficiently disseminate to the other organs. We also attempted to measure white  
195 and opaque cells in the bloodstream during this experiment but were unable to  
196 recover a significant number of colony-forming units, consistent with what has  
197 previously been observed for the tail-vein injection model (van Deventer et al.,  
198 1995; Lionakis et al., 2011).

199           Consistent with the previous experiments, cells recovered from the kidney  
200 were overwhelmingly white. In several mice, a significant portion of the white cells  
201 isolated from the kidney had been initially injected as opaque cells indicating  
202 significant opaque-to-white switching *in vivo* (0-58% of cells, depending on the  
203 mouse, Figure 3b, 3c, Dataset 5). We also performed an experiment with an  
204 inoculum comprised only of opaque cells, half of which were marked with GFP and  
205 half of which were marked with mCherry ( $6.2 \times 10^5$  cells). Both populations were

206 recovered from the kidney, and most recovered cells had switched from opaque-to-  
207 white (Figure S4). We did observe an unanticipated outcome of this experiment.  
208 Rather than an equal ratio of the two strains (as was present in the inoculum), the  
209 majority of cells in each individual mouse expressed either GFP or mCherry. We  
210 speculate that this observation reflects the stochastic nature of white-opaque  
211 switching: there would be a strong bias towards colonization by whichever  
212 fluorescent strain switched first.

213 Consistent with this interpretation is an additional control experiment: mice  
214 injected with an inoculum containing an equal number of white-GFP and white-  
215 mCherry cells ( $5 \times 10^5$  cells total) resulted in approximately equal numbers of GFP  
216 and mCherry-expressing white cells in the kidneys of three of four mice (Figure S5).

## 217 **Opaque cells switch to white cells in an intestinal** 218 **colonization model**

219 To investigate how white and opaque cells compare in GI tract colonization,  
220 we utilized the standard intestinal colonization model (Pande et al., 2013; Perez et  
221 al., 2013; Rosenbach et al., 2010). Here, we introduced an inoculum comprised of  
222 an equal ratio of white and opaque cells by oral gavage ( $5 \times 10^7$  cells total per  
223 mouse, n=8 mice, Figure 4a). Colonization was monitored by collecting fecal pellets  
224 at various time points post-inoculation. We observed that nearly all the introduced  
225 opaque cells had switched to white cells within 24 hours and remained white until  
226 the mice were sacrificed after 17 days (Figure 4b). All cells injected as white cells  
227 remained as white cells throughout the experiment; we did not observe any  
228 instance of white-to-opaque switching (>3500 colony-forming units observed). We  
229 note that these results mirror, at least superficially, those observed in the kidney

230 following tail-vein injection infections described above. Moreover, they are  
231 consistent with results from the oropharyngeal candidiasis model, where introduced  
232 opaque cells were either cleared from the oropharynx or switched rapidly to white  
233 cells (Solis et al., 2018). Because the observation that opaque cells do not compete  
234 well with white cells in the GI tract is entirely consistent with what has been  
235 previously published (Böhm et al., 2017), we conclude that tagging white and  
236 opaque cells with fluorophores did not introduce any bias that affects strain  
237 competition in the GI tract.

238         The standard intestinal colonization model employed above involves a 4-day  
239 antibiotic treatment of the mice preceding the *C. albicans* inoculation. To compare  
240 white and opaque cells in the GI tract in the presence of an intact mouse  
241 microbiota, we inoculated non-antibiotic treated mice with an equal number of white  
242 and opaque cells via oral gavage ( $1 \times 10^8$  cells total per mouse, n=4 mice, Figure 4c)  
243 and then tracked white and opaque cells during the infection through fecal pellets.  
244 As expected, we found that significantly fewer *C. albicans* cells colonized the GI  
245 tract when an intact microbiota was present (Figure 4d, ~100-1000 times fewer than  
246 in the standard model described above and in Figure 4a) and that the few cells that  
247 did colonize the GI tract were almost exclusively white cells that had been injected  
248 as white cells. We did not observe long-term survival of any cells that were  
249 introduced as opaque cells. These results indicate that opaque cells are out-  
250 competed by white cells in the murine gut colonization model and that this trend is  
251 more pronounced in the untreated mice than in the antibiotic-treated mice.

## 252 **Discussion**

253           White and opaque cells are distinct, heritable cell types of *C. albicans*  
254 produced from the same genome. White cells and opaque cells differ in many  
255 characteristics and are believed to be specialized for different niches in their  
256 mammalian hosts (reviewed in Huang, 2012; Lohse and Johnson, 2009;  
257 Morschhäuser, 2010; Soll, 2014, 1992, 2004). We used variations on two murine  
258 models of *C. albicans* infection combined with isogenic fluorescent reporter strains  
259 to directly compare the fate of white and opaque cells *in vivo* and to also monitor  
260 switching between the two cell types in the host.

261           Many published experiments have monitored the fate of *C. albicans* white  
262 cells in murine models of infection, and our results with white cells are entirely  
263 consistent with this large body of data. While most of the experiments in the  
264 literature have utilized SC5314-derived strains, which are a/α and therefore remain  
265 locked as white cells, we used mating type **a** derivatives of SC5314, which have the  
266 ability to undergo white-opaque switching. Despite this difference, white **a** cells, in  
267 our experiments, behaved similarly to white a/α cells in the published literature. In a  
268 sense, we treated white cells as a control to understand the fate of genetically  
269 identical opaque cells. We also note that one of our observations with opaque cells,  
270 namely that opaque cells are deficient in colonizing the kidney relative to white  
271 cells, is consistent with a previous report (Kvaal et al., 1997).

272           To gain a better understanding of opaque cells *in vivo*, we examined four  
273 organs in addition to the kidney. Because the standard animal models of *C.*  
274 *albicans* infection have been optimized to study white cells (predominantly a/α

275 cells), we also varied the dosage, timing and antibiotic treatments in these models  
276 to increase the chances of observing opaque cell behavior *in vivo*. Finally, although  
277 our *Candida* strains had been genetically altered to express different fluorescent  
278 proteins, they represent normal switching strains rather than strains locked in one  
279 form or the other. We show that during systemic infection initiated by tail-vein  
280 injection, opaque cells can disseminate into the bloodstream and colonize all five of  
281 the organs we monitored. However, the pattern of colonization across organs differs  
282 significantly from that of white cells. For example, when injected in equal numbers,  
283 white cells greatly predominated in the kidney with a substantial fraction of the white  
284 cells having initially been injected as opaque cells and undergone opaque-to-white  
285 switching. In contrast, opaque cells outnumbered white cells in the heart and  
286 spleen, perhaps our most significant observation. Roughly equivalent colonization  
287 of the two cell types was observed in the liver and brain. From this work, we have  
288 identified *in vivo* environments where opaque cells compete favorably with white  
289 cells; such environments have only rarely been identified *in vitro* (Ene et al., 2016).  
290 We anticipate that further modification of *C. albicans* infection models previously  
291 optimized for white cells will be valuable in learning about the function of opaque  
292 cells *in vivo*.

293         In the mouse GI model, white cells out-numbered opaque cells at every time  
294 point in every mouse. All of the cells we examined that had been introduced as  
295 opaque cells and subsequently recovered in the GI model had switched to the white  
296 cell type, further supporting the advantage of white cells for this model in wild-type  
297 cells.

298           Finally, we observed evidence of wide-spread opaque-to-white switching in  
299 both murine models. In the GI model, extensive opaque-to-white switching occurred  
300 early (day 1) in the colonization process. In the systemic model, we recovered white  
301 cells that had initially been injected as opaque cells from the kidney, liver, spleen,  
302 brain and heart (Figure 2, Figure S3). Although we do not know exactly when these  
303 cells switched, the results suggest that it generally occurred after opaque cells had  
304 colonized the organ in question (see results section). If this model is correct, then  
305 switching rates must differ from organ to organ ranging from little or none occurring  
306 in the heart to extensive switching in the brain and kidney. This conclusion is  
307 consistent with a number of *in vitro* studies showing that both switching rates and  
308 relative growth rates of white and opaque cells differ across media conditions (Ene  
309 et al., 2016).

310           Since its discovery in 1987 by Soll and colleagues, white-opaque switching  
311 has been extensively studied by numerous laboratories. However, the selective  
312 pressure that has preserved white-opaque switching across a clade of species (*C.*  
313 *albicans*, *C. dubliniensis*, and *C. tropicalis*) representing 50 million years of  
314 evolutionary time is not understood. White and opaque cells differ in their  
315 appearance, their mating ability, their recognition by macrophages, and their growth  
316 on different laboratory media. Yet, the extensive gene expression changes between  
317 the two cell types suggest that these phenotypic differences constitute only a  
318 subset of the total range of differences. In this paper, we have documented several  
319 additional phenotypic differences; specifically, differences in organ colonization. In  
320 particular, we show for the first time that opaque cells out compete white cells in

321 two organs, the heart and spleen. It also appears that opaque-to-white switching  
322 occurs at significantly different rates in different organs. These observations  
323 strongly support the hypothesis that white and opaque cells are specialized to  
324 “match” different niches in the host. It is now possible to test this hypothesis  
325 explicitly by analyzing colonization by white and opaque cells in which different  
326 “opaque-specific” and “white-specific” genes have been deleted.

## 327 **Materials and Methods**

### 328 **Plasmid construction**

329 Plasmids for GFP or mCherry tagging of *TEF2* were constructed as follows.  
330 The last 500 bp of the *TEF2* open reading frame (ORF) (excluding the stop codon)  
331 were PCR amplified with a 5' SphI site and a 3' linker for either GFP or mCherry.  
332 The 500bp immediately 3' of the *TEF2* ORF was PCR amplified between NotI and  
333 AatII sites. *C. albicans* optimized GFP (Cormack et al., 1997) was PCR amplified  
334 with a 5' 3x Gly linker and a 3' XhoI site. *C. albicans* optimized mCherry (Lohse and  
335 Johnson, 2016) was PCR amplified with a 5' GRRIPGLIN linker and a 3' XhoI site.  
336 We then merged the two *TEF2* fragments and either GFP or mCherry into one  
337 fragment during a second round of PCR. This resulted in a SphI-end of *TEF2* ORF-  
338 GFP-XhoI-NotI-*TEF2* 3' flank-AatII fragment and a SphI-end of *TEF2* ORF-  
339 mCherry-XhoI-NotI-*TEF2* 3' flank-AatII fragment that were digested with SphI and  
340 AatII and ligated into pUC19 (NEB) to form pMBL183 and pMBL184. Following  
341 sequencing, the plasmids were then digested with XhoI and NotI and ligated with  
342 the similarly digested SAT1 flipper cassette from pSFS2A (Reuss et al., 2004) to



343 form pMBL187 and pMBL188. Both plasmids were digested with SphI and AatII  
344 prior to transformation into *C. albicans*.

### 345 ***C. albicans* Strain construction**

346 MLY612/613 are derived from the switching-capable AHY135 background  
347 (Hernday et al., 2013), a strain where the *HIS1* and *LEU2* markers were added  
348 back to RZY47 (Zordan et al., 2006). The untagged strains MLY537 (white) and  
349 MLY589 (opaque) are stocks of AHY135 (white) and its opaque equivalent,  
350 AHY136, respectively. AHY135 was transformed with linearized pMBL187 or  
351 pMBL188 and selected for growth on Yeast Extract Peptone Dextrose (YEPD)  
352 supplemented with 200 µg/ml nourseothricin (clonNAT, WERNER BioAgents, Jena,  
353 Germany). Insertion was verified by colony PCR against the 5' and 3' flanks. The  
354 *SAT1* marker was then recycled by growth in Yeast Extract Peptone (YEP) media  
355 lacking dextrose that was supplemented with 2% Maltose for 6-24 hours at 30°C.  
356 Cells were then plated on YEPD supplemented with 25 µg/ml nourseothricin and  
357 grown for 24 hours at 30°C. Loss of the *SAT1* cassette was then verified by a  
358 second round of colony PCR against the 5' and 3' flanks. The strain genotypes are  
359 listed in detail in Table 1.

360 MLY612/613 were grown on synthetic complete media supplemented with  
361 2% glucose and 100 µg/ml uridine (SD+AA+Uri) at room temperature  
362 (approximately 22°C) and examined for opaque sectors, which were then isolated  
363 to make opaque glycerol stocks (MLY629/642).

**Table 1: *C. albicans* strains used in this study**

| Strain | Common Name | Strain Genotype |
|--------|-------------|-----------------|
|--------|-------------|-----------------|

| Number             |                 |                                                                                                                                                                   |
|--------------------|-----------------|-------------------------------------------------------------------------------------------------------------------------------------------------------------------|
| MLY537<br>(AHY135) | Untagged White  | WHITE MATa/a C.m. <i>LEU2/leu2Δ</i> C.d. <i>HIS1/his1Δ</i><br><i>URA3/ura3Δ::imm<sup>434</sup></i> <i>IRO1/iro1Δ::imm<sup>434</sup></i>                           |
| MLY589<br>(AHY136) | Untagged Opaque | OPAQUE MATa/a C.m. <i>LEU2/leu2Δ</i> C.d. <i>HIS1/his1Δ</i><br><i>URA3/ura3Δ::imm<sup>434</sup></i> <i>IRO1/iro1Δ::imm<sup>434</sup></i>                          |
| MLY612             | White-GFP       | WHITE MATa/a C.m. <i>LEU2/leu2Δ</i> C.d. <i>HIS1/his1Δ</i><br><i>URA3/ura3Δ::imm<sup>434</sup></i> <i>IRO1/iro1Δ::imm<sup>434</sup></i> <i>TEF2-GFP/TEF2</i>      |
| MLY613             | White-mCherry   | WHITE MATa/a C.m. <i>LEU2/leu2Δ</i> C.d. <i>HIS1/his1Δ</i><br><i>URA3/ura3Δ::imm<sup>434</sup></i> <i>IRO1/iro1Δ::imm<sup>434</sup></i> <i>TEF2-mCherry/TEF2</i>  |
| MLY629             | Opaque-GFP      | OPAQUE MATa/a C.m. <i>LEU2/leu2Δ</i> C.d. <i>HIS1/his1Δ</i><br><i>URA3/ura3Δ::imm<sup>434</sup></i> <i>IRO1/iro1Δ::imm<sup>434</sup></i> <i>TEF2-GFP/TEF2</i>     |
| MLY642             | Opaque-mCherry  | OPAQUE MATa/a C.m. <i>LEU2/leu2Δ</i> C.d. <i>HIS1/his1Δ</i><br><i>URA3/ura3Δ::imm<sup>434</sup></i> <i>IRO1/iro1Δ::imm<sup>434</sup></i> <i>TEF2-mCherry/TEF2</i> |

## 364 **Growth Rate Data Acquisition and Assay**

365 SD+AA+Uri overnight cultures (25°C) of GFP-tagged, mCherry-tagged, and  
366 untagged white and opaque cells were started from white or opaque colonies  
367 without visible sectors. The following morning, the overnight cultures were diluted to  
368 a density of  $OD_{600} = 0.01$  in 100  $\mu$ l of SD+AA+Uri. Growth curve assays were  
369 performed on a Tecan Spark 10M at a temperature of 25°C. Absorbance was  
370 measured for each well every 15 min for 47.25 hours (190 cycles); the plate was  
371 shaken continuously between reads. This setup allowed cells to recover from the  
372 dilution, enter log phase growth, and to eventually reach saturation. Three biological  
373 replicates (each originating from separate overnight cultures) were tested for each  
374 sample. Additionally, three technical replicates from each biological replicate were  
375 tested yielding a total of nine wells for each of the six strains tested. As a control,  
376 uninoculated (blank) wells were also included.

377           At each time point, the background-subtracted absorbance was calculated by  
378 subtracting the average absorbance of 24 blank wells from the absorbance of each  
379 well. For the plots in Figure S1, the natural log of the average background-  
380 subtracted absorbance for each set of three technical replicates is plotted. The  
381 specific growth rates (1/hr) in Dataset 1 were estimated for each well as the  
382 maximum slope of a smooth fit to the background-subtracted data. An R script  
383 found the maximum value for a fixed time window in every well that met the  
384 following three criteria. First, the time window had to be 4 hours long (thus,  
385 including 17 total measurements), second, the correlation coefficient ( $R^2$ ) of the fit  
386 had to be at least 0.98, third, the background-subtracted absorbance value had to  
387 be at least 0.15 for each of the measurements in the time window. The average and  
388 individual specific growth rates for each strain are tabulated in Dataset 1.

389           To complete our analysis, we used Welch's *t*-test (unpaired and two tailed) to  
390 compare the growth rates of the three opaque strains with each other and of the  
391 three white strains with each other. These values are also included in Dataset 1, we  
392 note that none of the p-values for these comparisons was less than 0.1.

## 393 **Plating Assay Validation**

394           SD+AA+Uri overnight cultures were started from two independent white  
395 (MLY613) and opaque colonies (MLY629). The overnight cultures were diluted to  
396 an  $OD_{600} = 0.5$  in SD+AA+Uri before being loaded into a BD Accuri C6 Plus flow  
397 cytometer (BD Biosciences) to measure cell number and fluorescence. A blue (488  
398 nm) laser was used to excite GFP and emission was detected using a 533/30 nm

399 bandpass filter. The GFP expression of these MLY613 and MLY629 diluted cultures  
400 were measured to determine a gate where more than 99% of MLY629 (opaque-  
401 GFP) cells were above the GFP threshold and more than 99% of MLY613 (white-  
402 mCherry) cells were below the GFP threshold. The cell counts from these  
403 measurements were used to create mixtures of white-opaque populations, diluted  
404 10-fold in SD+AA+Uri from the initial stocks, where the fraction of white cells in  
405 each population (ranging from 0-100%) were known. The fraction of white cells in  
406 these mixtures were then measured by flow cytometry (measuring the proportion of  
407 the cells that are below the previously established GFP threshold) and by plating  
408 (measuring the proportion of the resulting colonies that are white). Plating was on  
409 SD+AA+Uri at 25°C and colony morphology was scored after 3 days growth; only  
410 colonies that were completely white or opaque were counted. We note that the cells  
411 had to be diluted before plating so that only ~100 colonies would grow on each  
412 plate (making the colonies on the plate easy to score as either white or opaque).  
413 The correlation between the fraction of white cells as determined by plating and  
414 cytometry are shown in Figure S2. The linear regression of these data, calculated in  
415 Graphpad Prism 8, showed that the data fit the line  $y=1.0182x-3.548$  with a  
416 correlation coefficient ( $R^2$ )=0.9949. The raw data underlying the correlation are  
417 included in Dataset 2.

## 418 **Gastrointestinal Tract Colonization Model**

419 The procedure used was essentially as described previously (Perez et al.,  
420 2013, Rosenbach et al., 2010; White et al., 2007). In brief, female Swiss Webster  
421 mice (6 weeks old, 18–20 g) were housed two per cage and treated with antibiotics

422 (tetracycline [1 mg/ml]), streptomycin [2 mg/ml], and gentamycin [0.1 mg/ml]) added  
423 to their drinking water throughout the experiment, beginning 4 days before  
424 inoculation. In one experiment, as indicated, mice were not treated with antibiotics  
425 prior to inoculation or for the duration of the experiment.

426         Prior to inoculation, *C. albicans* strains were grown for 18 h at 25°C in  
427 SD+AA+Uri liquid medium, washed twice with PBS, and counted in a  
428 hemocytometer. Mice were orally inoculated, with either  $5 \times 10^7$  or  $1 \times 10^8$  *C. albicans*  
429 cells (in a 0.1 or 0.2 ml volume) as indicated, by gavage using a feeding needle.  
430 Colonization was monitored through the collection of fecal pellets (produced at the  
431 time of collection) at various days post-inoculation and at the end of the experiment  
432 when the mice were sacrificed.

433         Fecal pellets were weighed and suspended in sterile PBS. The fecal  
434 homogenates were serially diluted and 100  $\mu$ l was plated onto SD medium  
435 containing ampicillin (50 mg/ml) and gentamycin (15 mg/ml). The antibiotics were  
436 used to prevent the growth of any contaminating bacteria. Colony forming units  
437 were determined per gram of feces. All mice were sacrificed by CO<sub>2</sub> euthanasia  
438 followed by cervical dislocation.

439         This study was carried out in strict accordance with the recommendations in  
440 the Guide for the Care and Use of Laboratory Animals of the National Institutes of  
441 Health. The protocol was approved by the University of California San Francisco-  
442 Institutional Animal Care and Use Committee (Protocol number AN169466-02a). All  
443 efforts were made to minimize suffering.

444         A summary of mouse experiments is tabulated in Table 2.

## 445 Systemic Infection Model

446 Female BALB/c mice (6 weeks old, 18–20 g) were infected with the *C.*  
447 *albicans* inoculum via tail vein injection. Saturated *C. albicans* cultures were grown  
448 at 25°C for 18 hours in SD+AA+Uri liquid medium. Cells were washed twice with  
449 sterile saline, counted in a hemocytometer and the specified inoculum was injected  
450 via tail vein in a 0.1 ml volume. Signs of infection were monitored twice per day  
451 throughout the experimental time course. In some experiments, mice were  
452 sacrificed after 24 hours. In other experiments, mice were sacrificed upon signs of  
453 illness (including inability to ambulate, staggered gait, hypothermia or significant  
454 weight loss). All mice were sacrificed by CO<sub>2</sub> euthanasia followed by cervical  
455 dislocation.

456 This study was carried out in strict accordance with the recommendations in  
457 the Guide for the Care and Use of Laboratory Animals of the National Institutes of  
458 Health. The protocol was approved by the Office of Ethics and Compliance:  
459 Institutional Animal Care and Use Program (Protocol number AN169466-02a). All  
460 efforts were made to minimize suffering.

461 A summary of mouse experiments is tabulated in Table 2.

**Table 2: Summary of *in vivo* experiments conducted in this work**

| Inoculum Strain 1 | Inoculum Strain 2 | Infection Type (Figure #) | Total Inoculum                           | Duration | Number of Mice      | Samples Harvested |
|-------------------|-------------------|---------------------------|------------------------------------------|----------|---------------------|-------------------|
| White-GFP         | White-mCherry     | Systemic (Figure 1)       | $2.2 \times 10^6$                        | 24 hours | 4                   | 5 Organs          |
| White-mCherry     | Opaque-GFP        | Systemic (Figure 2)       | $8.0 \times 10^5$ ,<br>$1.6 \times 10^6$ | 24 hours | 8 (4 Each Inoculum) | 5 Organs          |
| Opaque-GFP        | Opaque-mCherry    | Systemic (Figure S3)      | $1.6 \times 10^6$                        | 24 hours | 4                   | 5 Organs          |

|               |                |                                                    |                   |                              |   |               |
|---------------|----------------|----------------------------------------------------|-------------------|------------------------------|---|---------------|
| White-mCherry | Opaque-GFP     | Systemic (Figure 3)                                | $5.0 \times 10^5$ | Variable (Onset of Sickness) | 7 | Kidneys       |
| Opaque-GFP    | Opaque-mCherry | Systemic (Figure S4)                               | $6.2 \times 10^5$ | Variable (Onset of Sickness) | 8 | Kidneys       |
| White-GFP     | White-mCherry  | Systemic (Figure S5)                               | $5.0 \times 10^5$ | Variable (Onset of Sickness) | 4 | Kidneys       |
| White-mCherry | Opaque-GFP     | Intestinal Colonization (Figure 4B)                | $5.0 \times 10^7$ | 17 days                      | 8 | Fecal Pellets |
| White-mCherry | Opaque-GFP     | Intestinal Colonization, No Antibiotic (Figure 4D) | $1.0 \times 10^8$ | 7 days                       | 4 | Fecal Pellets |

## 462 Organ Processing and Visualization

463 After dissection, organs were harvested, flash frozen, and placed in a  $-80^{\circ}\text{C}$   
464 freezer. Organs were thawed on ice, homogenized in 1 ml PBS, serially diluted in  
465 PBS, and plated onto SD medium containing ampicillin (50 mg/ml) and gentamycin  
466 (15 mg/ml). The antibiotics were used to prevent the growth of any contaminating  
467 bacteria. Colonies were visualized for fluorescence using a Leica  
468 stereomicroscope. Colony forming units were determined per gram of organ.

## 469 Animal Model Data Analysis

470 The colony forming units per organ are tabulated in Datasets 3-6. The raw  
471 data were normalized to the inoculum such that the inoculum was always 50:50  
472 (this is why some of the numbers are not whole numbers). These normalized colony  
473 counts were plotted in all figures and were used to determine whether or not there  
474 were statistical differences between different distributions. First, we tested whether  
475 or not there were statistical differences between cells that were injected as white

476 and cells that were injected as opaque. In other words, irrespective of whether the  
477 cell types switched to another cell-type after they were injected, we tested whether  
478 or not there was a difference in their initial colonization. These two distributions  
479 (normalized colony counts of cell that were injected white and normalized colony  
480 counts of cells that were injected opaque) were compared with a non-parametric  
481 test, the Wilcoxon matched-pairs signed rank test, to generate p-values and  
482 determine significance. Next, we tested whether or not there were statistical  
483 differences between the stability of the cell types. In other words, we compared two  
484 distributions (normalized colony counts of cells that were injected white and  
485 remained white and normalized colony counts of cells that were injected opaque  
486 and remained opaque) using the same non-parametric statistical test (Wilcoxon  
487 matched-pairs signed rank test) used above. The statistical analysis was conducted  
488 independently for each experiment and for each organ with GraphPad Prism 7.  
489 The raw data, normalized data and p-values are reported in Datasets 3-6.

## 490 **Acknowledgements**

491 We thank the Preclinical Therapeutic Core Facility, and especially Donghui  
492 Wang for help with tail-vein injections and oral gavage, respectively. We thank  
493 Naomi Ziv for the R script that was used to analyze the plate reader data in Figure  
494 S1 and Dataset 1. We thank the Li Lab for use of the Leica stereomicroscope and  
495 members of the Johnson lab for discussion.

## 496 **Figure Legends**



497 **Figure 1 Legend: The use of fluorescent reporters does not influence C.**  
498 ***albicans* activity *in vivo*.** (a) Using a flowchart, the experimental setup, cell type,  
499 and potential fluorescence phenotypes for each strain are tabulated. In this case,  
500 white cells expressing GFP and mCherry were co-injected into the tail-veins of 4  
501 mice. Five organs, the kidney, liver, heart, spleen and brain, were processed to  
502 measure white and opaque cell colonization as well as white-opaque switching. The  
503 mechanistic interpretation of each phenotype; in other words, whether or not it  
504 indicates cell-type switching, is also indicated. The colony-forming units of white  
505 cells expressing GFP (yellow) and the colony-forming units of white cells  
506 expressing mCherry (red) are plotted for each mouse for the (b) kidney, (c) liver, (d)  
507 heart, (e) spleen and (f) brain. (g) The mean percentage (from n=4 mice) of total  
508 cells that are white cells expressing GFP (yellow) and white cells expressing  
509 mCherry (red) are plotted per organ as a horizontal bar graph. The raw data for this  
510 experiment is available in Dataset 3.

511 **Figure 2 Legend: Opaque cells can colonize multiple organs but white cells**  
512 **are preferred in the kidney.** (a) Using a flowchart, the experimental setup, cell  
513 type, and potential fluorescence phenotypes for each strain are tabulated. In this  
514 case, white cells expressing mCherry and opaque cells expressing GFP were co-  
515 injected into the tail-veins of 8 mice. Five organs, the kidney, liver, heart, spleen  
516 and brain, were processed to measure white and opaque cell colonization as well  
517 as white-opaque switching. The mechanistic interpretation of each phenotype; in  
518 other words, whether or not it indicates cell-type switching, is also indicated. The  
519 colony-forming units of cells that remained white (i.e. white cells expressing

520 mCherry, red), that remained opaque (i.e. opaque cells expressing GFP, blue), and  
521 that switched from opaque-to-white (i.e. white cells expressing GFP, dashed pink)  
522 are plotted for each mouse for the (b) kidney, (c) liver, (d) heart, (e) spleen and (f)  
523 brain. The left side of each horizontal bar graph refers to cells that were white at the  
524 end of the experiment while the right side of each horizontal bar graph refers to  
525 cells that were opaque at the end of the experiment. The four mice that received the  
526 lower inoculums are indicated in each panel. (g) The mean percentage of total cells  
527 that remained white (i.e. white cells expressing mCherry, red), that remained  
528 opaque (i.e. opaque cells expressing GFP, blue), and that switched from opaque-  
529 to-white (i.e. white cells expressing GFP, dashed pink) are plotted per organ as a  
530 horizontal bar graph. The left side of the horizontal bar graph refers to cells that  
531 were white at the end of the experiment while the right side refers to cells that were  
532 opaque at the end of the experiment. The raw data for this experiment is available  
533 in Dataset 4.

534 **Figure 4: White cells are preferred in an intestinal colonization model of**  
535 **infection.** (a) Using a flowchart, the experimental setup, cell type, and potential  
536 fluorescence phenotypes for each strain are tabulated. In this case, white cells  
537 expressing mCherry and opaque cells expressing GFP were inoculated into 8 mice  
538 via oral gavage. Fecal pellets were processed to measure white and opaque cell  
539 colonization as well as white-opaque switching. The mechanistic interpretation of  
540 each phenotype; in other words, whether or not it indicates cell-type switching, is  
541 also indicated. (b) The colony-forming units of white cells expressing GFP (meaning  
542 they underwent opaque-to-white switching, blue circles) and the colony-forming

543 units of white cells expressing mCherry (red squares) are plotted for each mouse  
544 over the course of the 17-day experiment. The raw data from this figure is available  
545 in Dataset 6. (c) Using a flowchart, the experimental setup, cell type, and potential  
546 fluorescence phenotypes for each strain are tabulated. In this case, white cells  
547 expressing mCherry and opaque cells expressing GFP were inoculated into 4 mice  
548 via oral gavage. Unlike the experiment in panels a-b, these mice were not treated  
549 with antibiotics prior to the inoculation. Fecal pellets were processed to measure  
550 white and opaque cell colonization as well as white-opaque switching. The  
551 mechanistic interpretation of each phenotype; in other words, whether or not it  
552 indicates cell-type switching, is also indicated. (d) The colony-forming units of white  
553 cells expressing GFP (meaning they underwent opaque-to-white switching, blue  
554 circles) and the colony-forming units of white cells expressing mCherry (red  
555 squares) are plotted for each mouse over the course of the seven-day experiment.  
556 The raw data from this Figure is available in Dataset 6.

## 557 **Supporting Information Captions**

558 **Figure S1: Fluorescently tagging white and opaque cells does not impact**  
559 **their growth rate.** (a) White cells without a fluorescent tag (grey), white cells  
560 expressing GFP (green), and white cells expressing mCherry (red) were grown in  
561 SD+AA+Uri at 25°C. (b) Opaque cells without a fluorescent tag (grey), opaque cells  
562 expressing GFP (green), and opaque cells expressing mCherry (red) were grown in  
563 SD+AA+Uri at 25°C. In both panels the natural logarithm of the background  
564 subtracted absorbance at 600 nm, averaged from three technical replicates, is  
565 plotted as a function of time for the three biological replicates of each strain.

566 **Figure S2: Flow cytometry shows that our plating assay accurately captures**  
567 **the distribution of co-cultured white and opaque cells.** Opaque-GFP and white-  
568 mCherry cultures were independently grown. The cell density and fraction of the  
569 population expressing GFP (that is, opaque cells) or not expressing GFP (that is,  
570 white cells) were independently measured using a flow cytometer. The white and  
571 opaque cultures were then mixed at different ratios and the fraction of the  
572 population not expressing GFP (that is, white cells) was determined for each  
573 mixture using a flow cytometer. The mixtures were then plated and subsequently  
574 scored for colony phenotype. The proportion of the culture that did not express GFP  
575 (that is, white cells) was compared to the proportion of white colonies. The linear  
576 regression is indicated in grey.

577 **Figure S3, This data is related to Figure 2: Opaque cells can colonize organs**  
578 **without being co-injected with white cells.** (a) Using a flowchart, the  
579 experimental setup, cell type, and potential fluorescence phenotypes for each strain  
580 are tabulated. In this case, opaque cells expressing mCherry and opaque cells  
581 expressing GFP were co-injected into the tail-veins of 4 mice. Five organs, the  
582 kidney, liver, heart, spleen and brain, were processed to measure white and  
583 opaque cell colonization as well as white-opaque switching. The mechanistic  
584 interpretation of each phenotype; in other words, whether or not it indicates cell-  
585 type switching, is also indicated. The colony-forming units of cells that remained  
586 opaque (i.e. opaque cells expressing mCherry (light blue) or GFP (blue)) and of

587 cells that switched from opaque-to-white (i.e. white cells expressing GFP (dashed  
588 pink) or mCherry (dashed orange)) are plotted for each mouse for the (b) kidney, (c)  
589 liver, (d) heart, (e) spleen and (f) brain. The left side of each horizontal bar graph  
590 refers to cells that were white at the end of the experiment while the right side of  
591 each horizontal bar graph refers to cells that were opaque at the end of the  
592 experiment. (g) The mean percentage of total cells that remained opaque (i.e.  
593 opaque cells expressing mCherry (light blue) or GFP (blue)) or that switched from  
594 opaque-to-white (i.e. white cells expressing GFP (dashed pink) or mCherry (dashed  
595 orange)) are plotted per organ as a horizontal bar graph. The left side of the  
596 horizontal bar graph refers to cells that were white at the end of the experiment  
597 while the right side of the horizontal bar graph refers to cells that were opaque at  
598 the end of the experiment. The raw data for this experiment is available in Dataset  
599 4.

600 **Figure S4, This figure is related to Figure 3: Opaque cells switch to white cells**  
601 **in the kidney.** (a) Using a flowchart, the experimental setup, cell type, and  
602 potential fluorescence phenotypes for each strain are tabulated. In this case,  
603 opaque cells expressing mCherry and opaque cells expressing GFP were co-  
604 injected into the tail-veins of 8 mice. Upon the onset of illness, the kidney was  
605 processed to measure opaque cell colonization as well as opaque-to-white  
606 switching. The mechanistic interpretation of each phenotype; in other words,  
607 whether or not it indicates cell-type switching, is also indicated. (b) The colony-  
608 forming units of cells that remained opaque (i.e. opaque cells expressing mCherry

609 (light blue) or GFP (blue)) and of cells that switched from opaque-to-white (i.e. white  
610 cells expressing GFP (dashed pink) or mCherry (dashed orange)) are plotted per  
611 mouse as a horizontal bar graph. The left side of the horizontal bar graph refers to  
612 cells that were white at the end of the experiment while the right side of the  
613 horizontal bar graph refers to cells that were opaque at the end of the experiment.  
614 (c) The percentage of total cells that remained opaque (i.e. opaque cells expressing  
615 mCherry (light blue) or GFP (blue)) or that switched from opaque-to-white (i.e. white  
616 cells expressing GFP (dashed pink) or mCherry (dashed orange)) are plotted for  
617 each mouse as a horizontal bar graph. The left side of the horizontal bar graph  
618 refers to cells that were white at the end of the experiment while the right side of the  
619 horizontal bar graph refers to cells that were opaque at the end of the experiment.  
620 The raw data for this experiment is available in Dataset 5.

621 **Figure S5, related to Figure 3: White cells are stable in the kidney.** (a) Using a  
622 flowchart, the experimental setup, cell type, and potential fluorescence phenotypes  
623 for each strain are tabulated. In this case, white cells expressing mCherry and white  
624 cells expressing GFP were co-injected into the tail-veins of 4 mice. Upon the onset  
625 of illness, the kidney was processed to measure white cell colonization as well as  
626 white-opaque switching. The mechanistic interpretation of each phenotype; in other  
627 words, whether or not it indicates cell-type switching, is also indicated. (b) The  
628 colony-forming units of white cells expressing GFP (yellow) and the colony-forming  
629 units of white cells expressing mCherry (red) are plotted per mouse as a horizontal  
630 bar graph. The left side of the horizontal bar graph refers to cells that were white at

631 the end of the experiment while the right side of the horizontal bar graph refers to  
632 cells that were opaque at the end of the experiment. (c) The percentage of total  
633 cells that remained white (i.e. white cells expressing mCherry (red) or GFP (yellow))  
634 are plotted for each mouse as a horizontal bar graph. The left side of the horizontal  
635 bar graph refers to cells that were white at the end of the experiment while the right  
636 side of the horizontal bar graph refers to cells that were opaque at the end of the  
637 experiment. The raw data for this experiment is available in Dataset 5.

638 **Dataset 1: Raw data and statistical analysis of data plotted in Figure S1.**

639 **Dataset 2: Raw data for Figure S2.**

640 **Dataset 3: Raw data, normalized data, and statistical analysis of data plotted**  
641 **in Figure 1.**

642 **Dataset 4: Raw data, normalized data, and statistical analysis of data plotted**  
643 **in Figures 2 and S3.**

644 **Dataset 5: Raw data, normalized data, and statistical analysis of data plotted**  
645 **in Figures 3, S4 and S5.**

646 **Dataset 6: Raw data, normalized data, and statistical analysis of data plotted**  
647 **in Figure 4.**





## References

- 648 Bain, J.M., Stubberfield, C., and Gow, N.A.R. (2001). Ura-status-dependent adhesion of  
649 *Candida albicans* mutants. *FEMS Microbiol. Lett.* 204, 323–328.
- 650 Baker, S., and Bennett, J. (2007). An Overview of the Genus *Aspergillus*. pp. 3–13.
- 651 Böhm, L., Torsin, S., Tint, S.H., Eckstein, M.T., Ludwig, T., and Pérez, J.C. (2017). The  
652 yeast form of the fungus *Candida albicans* promotes persistence in the gut of gnotobiotic  
653 mice. *PLOS Pathog.* 13, e1006699.
- 654 Buchanan, K. (1998). What Makes *Cryptococcus neoformans* a Pathogen? *Emerg. Infect.*  
655 *Dis.* 4, 71–83.
- 656 Cormack, B.P., Bertram, G., Egerton, M., Gow, N.A., Falkow, S., and Brown, A.J. (1997).  
657 Yeast-enhanced green fluorescent protein (yEGFP): a reporter of gene expression in  
658 *Candida albicans*. *Microbiology* 143 ( Pt 2, 303–311.
- 659 van Deventer, A.J., Goessens, W.H., van Belkum, A., van Vliet, H.J., van Etten, E.W., and  
660 Verbrugh, H.A. (1995). Improved detection of *Candida albicans* by PCR in blood of  
661 neutropenic mice with systemic candidiasis. *J. Clin. Microbiol.* 33, 625–628.
- 662 Ene, I. V., Lohse, M.B., Vladu, A. V., Morschhäuser, J., Johnson, A.D., and Bennett, R.J.  
663 (2016). Phenotypic Profiling Reveals that *Candida albicans* Opaque Cells Represent a  
664 Metabolically Specialized Cell State Compared to Default White Cells. *MBio* 7, e01269-16.
- 665 Geiger, J., Wessels, D., Lockhart, S.R., and Soll, D.R. (2004). Release of a Potent  
666 Polymorphonuclear Leukocyte Chemoattractant Is Regulated by White-Opaque Switching  
667 in *Candida albicans*. *Infect. Immun.* 72, 667–677.
- 668 Hernday, A.D., Lohse, M.B., Fordyce, P.M., Nobile, C.J., DeRisi, J.D., and Johnson, A.D.  
669 (2013). Structure of the Transcriptional Network Controlling White-Opaque Switching in  
670 *Candida albicans*. *Mol. Microbiol.* 90, 22–35.
- 671 Huang, G. (2012). Regulation of phenotypic transitions in the fungal pathogen *Candida*  
672 *albicans*. *Virulence* 3, 251–261.
- 673 Huang, G., Wang, H., Chou, S., Nie, X., Chen, J., and Liu, H. (2006). Bistable expression of  
674 *WOR1*, a master regulator of white-opaque switching in *Candida albicans*. *Proc. Natl. Acad.*  
675 *Sci.* 103, 12813–12818.
- 676 Huang, G., Srikantha, T., Sahni, N., Yi, S., and Soll, D.R. (2009). CO<sub>2</sub> regulates white-to-  
677 opaque switching in *Candida albicans*. *Curr. Biol.* 19, 330–334.
- 678 Huang, G., Yi, S., Sahni, N., Daniels, K.J., Srikantha, T., and Soll, D.R. (2010). N-  
679 acetylglucosamine induces white to opaque switching, a mating prerequisite in *Candida*  
680 *albicans*. *PLoS Pathog.* 6, e1000806.
- 681 Kolotila, M.P., and Diamond, R.D. (1990). Effects of neutrophils and in vitro oxidants on  
682 survival and phenotypic switching of *Candida albicans* WO-1. *Infect. Immun.* 58, 1174–  
683 1179.
- 684 Kvaal, C., Lachke, S.A., Srikantha, T., Daniels, K., McCoy, J., and Soll, D.R. (1999).  
685 Misexpression of the opaque-phase-specific gene *PEP1* (*SAPI*) in the white phase of  
686 *Candida albicans* confers increased virulence in a mouse model of cutaneous infection.  
687 *Infect. Immun.* 67, 6652–6662.
- 688 Kvaal, C.A., Srikantha, T., and Soll, D.R. (1997). Misexpression of the white-phase-specific  
689 gene *WH11* in the opaque phase of *Candida albicans* affects switching and virulence. *Infect.*  
690 *Immun.* 65, 4468–4475.
- 691 Lan, C.-Y., Newport, G., Murillo, L.A., Jones, T., Scherer, S., Davis, R.W., and Agabian, N.

- 692 (2002). Metabolic specialization associated with phenotypic switching in *Candida albicans*.  
693 Proc. Natl. Acad. Sci. U. S. A. *99*, 14907–14912.
- 694 Lay, J., Henry, L.K., Clifford, J., Koltin, Y., Bulawa, C.E., and Becker, J.M. (1998). Altered  
695 expression of selectable marker *URA3* in gene-disrupted *Candida albicans* strains  
696 complicates interpretation of virulence studies. Infect. Immun. *66*, 5301–5306.
- 697 Lionakis, M.S., Lim, J.K., Lee, C.-C.R., and Murphy, P.M. (2011). Organ-Specific Innate  
698 Immune Responses in a Mouse Model of Invasive Candidiasis. J. Innate Immun. *3*, 180–  
699 199.
- 700 Lohse, M.B., and Johnson, A.D. (2008). Differential phagocytosis of white versus opaque  
701 *Candida albicans* by *Drosophila* and mouse phagocytes. PLoS One *3*, e1473.
- 702 Lohse, M.B., and Johnson, A.D. (2009). White-opaque switching in *Candida albicans*. Curr.  
703 Opin. Microbiol. *12*, 650–654.
- 704 Lohse, M.B., and Johnson, A.D. (2016). Identification and Characterization of Wor4, a New  
705 Transcriptional Regulator of White-Opaque Switching. G3 (Bethesda). *6*, 721–729.
- 706 Miller, M.G., and Johnson, A.D. (2002). White-opaque switching in *Candida albicans* is  
707 controlled by mating-type locus homeodomain proteins and allows efficient mating. Cell  
708 *110*, 293–302.
- 709 Morschhäuser, J. (2010). Regulation of white-opaque switching in *Candida albicans*. Med.  
710 Microbiol. Immunol. *199*, 165–172.
- 711 Noble, S.M., French, S., Kohn, L.A., Chen, V., and Johnson, A.D. (2010). Systematic  
712 screens of a *Candida albicans* homozygous deletion library decouple morphogenetic  
713 switching and pathogenicity. Nat. Genet. *42*, 590–598.
- 714 Odds, F.C. (1988). *Candida* and candidosis (London: Bailliere Tindall).
- 715 Odds, F.C., Van Nuffel, L., and Gow, N.A. (2000). Survival in experimental *Candida*  
716 *albicans* infections depends on inoculum growth conditions as well as animal host.  
717 Microbiology *146* ( Pt 8, 1881–1889.
- 718 Pande, K., Chen, C., and Noble, S.M. (2013). Passage through the mammalian gut triggers a  
719 phenotypic switch that promotes *Candida albicans* commensalism. Nat. Genet. *45*, 1088–  
720 1091.
- 721 Perez, J.C., Kumamoto, C.A., Johnson, A.D., Pérez, J.C., Kumamoto, C.A., and Johnson,  
722 A.D. (2013). *Candida albicans* Commensalism and Pathogenicity Are Intertwined Traits  
723 Directed by a Tightly Knit Transcriptional Regulatory Circuit. PLoS Biol *11*, e1001510.
- 724 Pfaller, M.A., and Diekema, D.J. (2007). Epidemiology of Invasive Candidiasis: a Persistent  
725 Public Health Problem. Clin. Microbiol. Rev. *20*, 133–163.
- 726 Porman, A.M., Hirakawa, M.P., Jones, S.K., Wang, N., and Bennett, R.J. (2013). MTL-  
727 independent phenotypic switching in *Candida tropicalis* and a dual role for Wor1 in  
728 regulating switching and filamentation. PLoS Genet. *9*, e1003369.
- 729 Pujol, C., Daniels, K.J., Lockhart, S.R., Srikantha, T., Radke, J.B., Geiger, J., and Soll, D.R.  
730 (2004). The closely related species *Candida albicans* and *Candida dubliniensis* can mate.  
731 Eukaryot. Cell *3*, 1015–1027.
- 732 Reuss, O., Vik, A., Kolter, R., and Morschhäuser, J. (2004). The *SAT1* flipper, an optimized  
733 tool for gene disruption in *Candida albicans*. Gene *341*, 119–127.
- 734 Rikkerink, E.H., Magee, B.B., and Magee, P.T. (1988). Opaque-white phenotype transition:  
735 a programmed morphological transition in *Candida albicans*. J. Bacteriol. *170*, 895–899.
- 736 Rosenbach, A., Dignard, D., Pierce, J. V, Whiteway, M., and Kumamoto, C.A. (2010).  
737 Adaptations of *Candida albicans* for growth in the mammalian intestinal tract. Eukaryot

738 Cell 9, 1075–1086.  
739 Sasse, C., Hasenberg, M., Weyler, M., Gunzer, M., and Morschhauser, J. (2013). White-  
740 Opaque Switching of *Candida albicans* Allows Immune Evasion in an Environment-  
741 Dependent Fashion. *Eukaryot. Cell* 12, 50–58.  
742 Slutsky, B., Staebell, M., Anderson, J., Risen, L., Pfaller, M., and Soll, D.R. (1987). "White-  
743 opaque transition":: a second high-frequency switching system in *Candida albicans*. *J.*  
744 *Bacteriol.* 169, 189–197.  
745 Solis, N. V., Park, Y.-N., Swidergall, M., Daniels, K.J., Filler, S.G., and Soll, D.R. (2018).  
746 *Candida albicans* White-Opaque Switching Influences Virulence but Not Mating during  
747 Oropharyngeal Candidiasis. *Infect. Immun.* 86.  
748 Soll, D. (2014). The role of phenotypic switching in the basic biology and pathogenesis of  
749 *Candida albicans*. *J. Oral Microbiol.* 6, 22993.  
750 Soll, D.R. (1992). High-frequency switching in *Candida albicans*. *Clin. Microbiol. Rev.* 5,  
751 183–203.  
752 Soll, D.R. (2004). Mating-type locus homozygosis, phenotypic switching and mating: a  
753 unique sequence of dependencies in *Candida albicans*. *BioEssays* 26, 10–20.  
754 Soll, D.R., Morrow, B., and Srikantha, T. (1993). High-frequency phenotypic switching in  
755 *Candida albicans*. *Trends Genet.* 9, 61–65.  
756 Soll, D.R., Anderson, J., Mihalik, R., Soll, D., Anderson, J., Soll, D., Aparicio, O.,  
757 Billington, B., Gottschling, D., Arkowitz, R., et al. (2009). Why does *Candida albicans*  
758 switch? *FEMS Yeast Res.* 9, 973–989.  
759 Tsong, A.E., Miller, M.G., Raisner, R.M., and Johnson, A. (2003). Evolution of a  
760 combinatorial transcriptional circuit: a case study in yeasts. *Cell* 115, 389–399.  
761 Tuch, B.B., Mitrovich, Q.M., Homann, O.R., Hernday, A.D., Monighetti, C.K., De La  
762 Vega, F.M., and Johnson, A.D. (2010). The transcriptomes of two heritable cell types  
763 illuminate the circuit governing their differentiation. *PLoS Genet.* 6, e1001070.  
764 Zaoutis, T.E., Argon, J., Chu, J., Berlin, J.A., Walsh, T.J., and Feudtner, C. (2005). The  
765 Epidemiology and Attributable Outcomes of Candidemia in Adults and Children  
766 Hospitalized in the United States: A Propensity Analysis. *Clin. Infect. Dis.* 41, 1232–1239.  
767 Zordan, R.E., Galgoczy, D.J., and Johnson, A.D. (2006). Epigenetic properties of white-  
768 opaque switching in *Candida albicans* are based on a self-sustaining transcriptional  
769 feedback loop. *Proc. Natl. Acad. Sci.* 103, 12807–12812.  
770

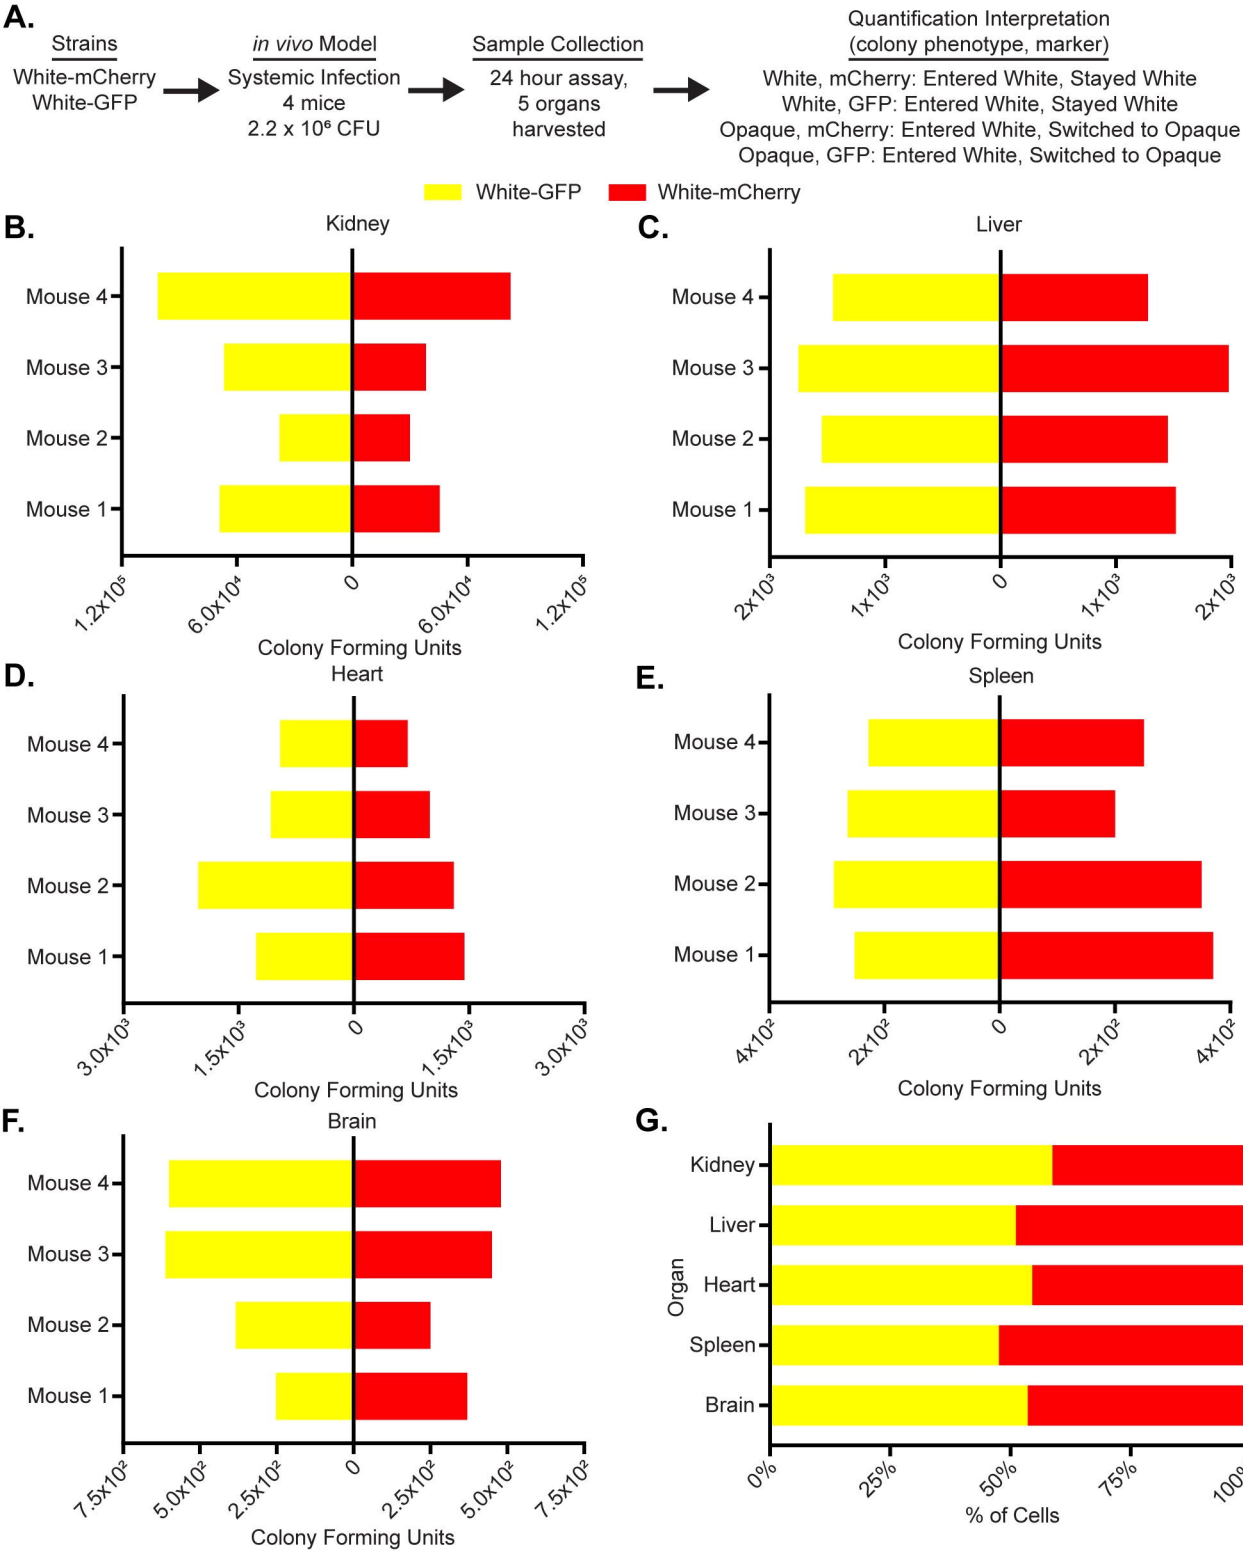

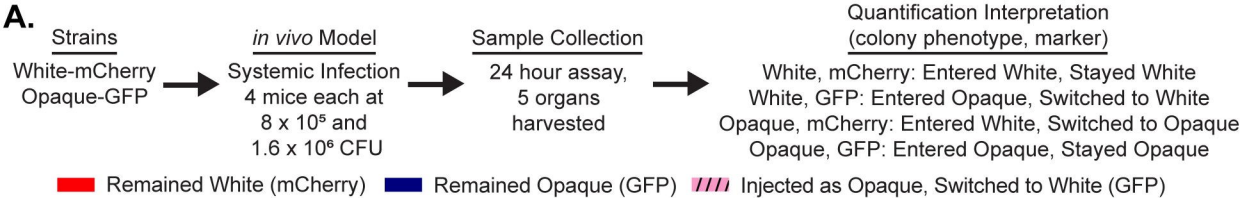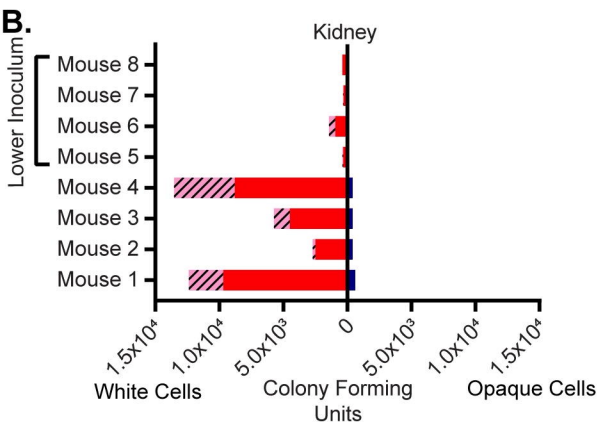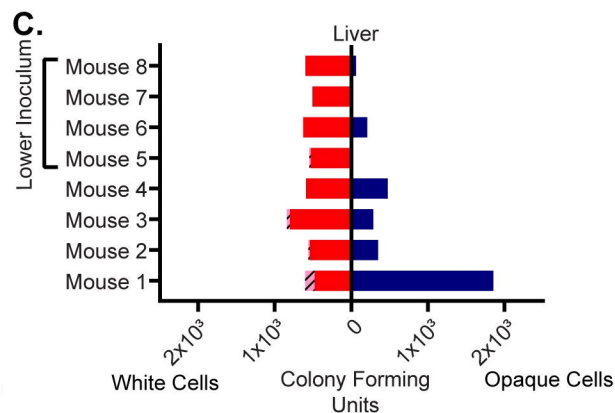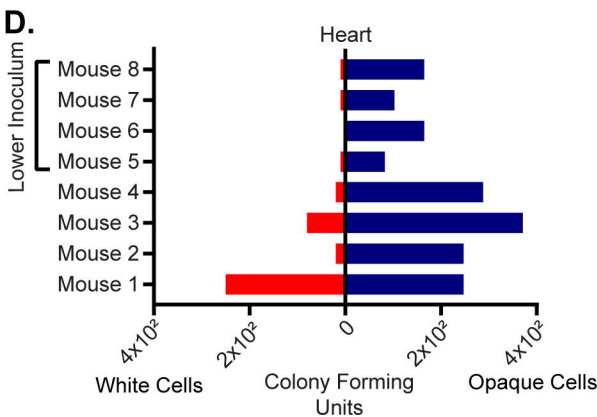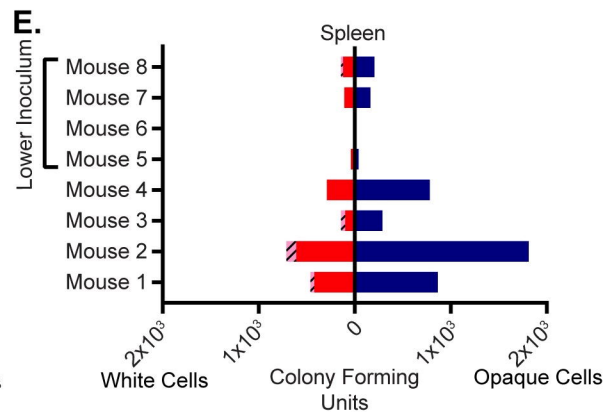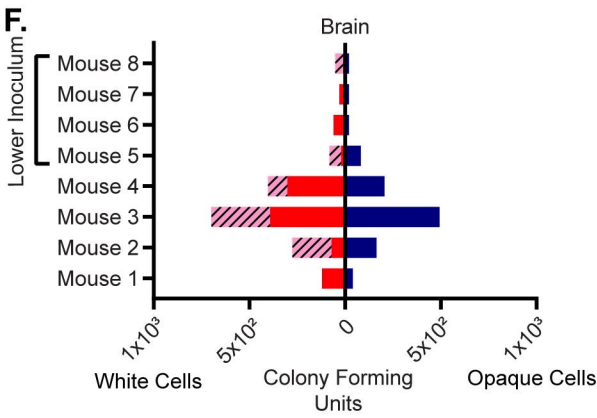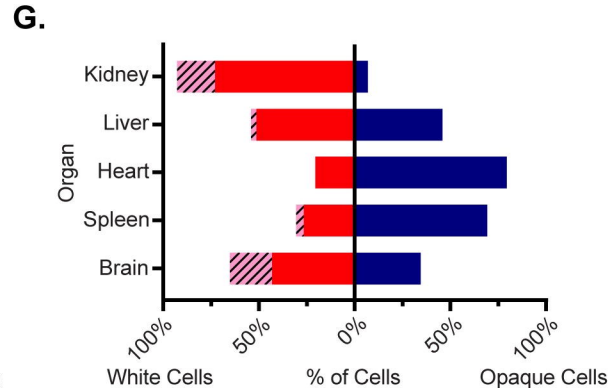

**A.**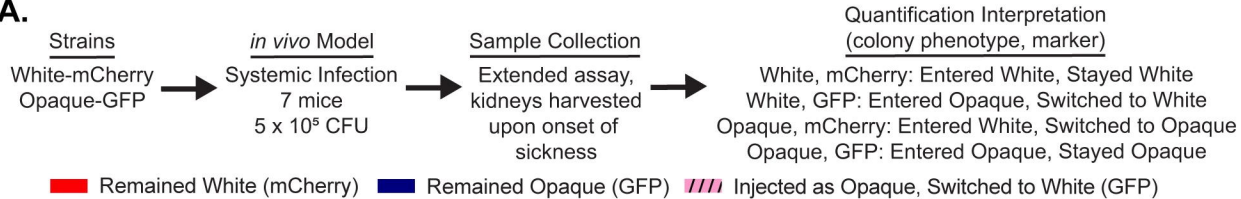**B.**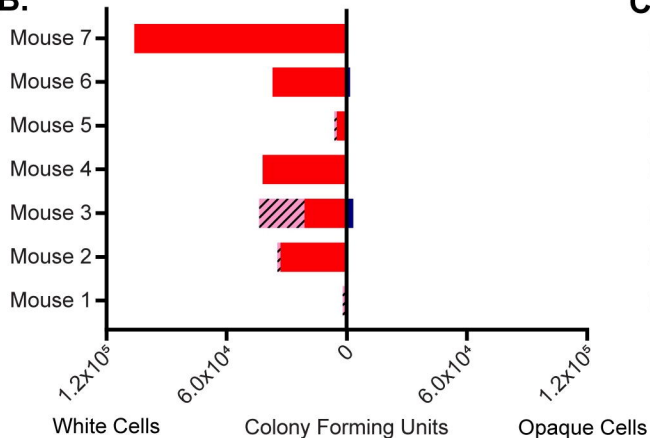**C.**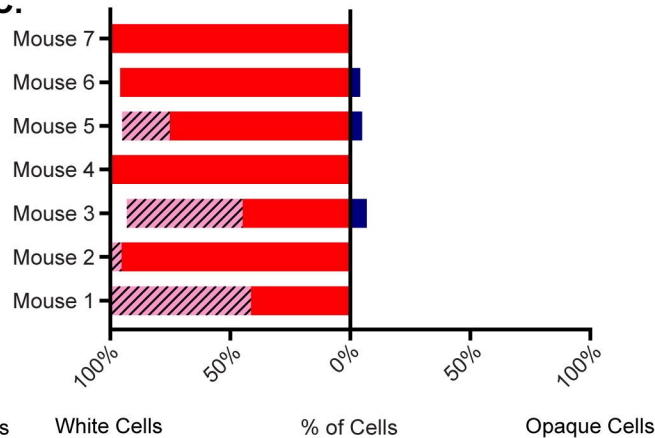



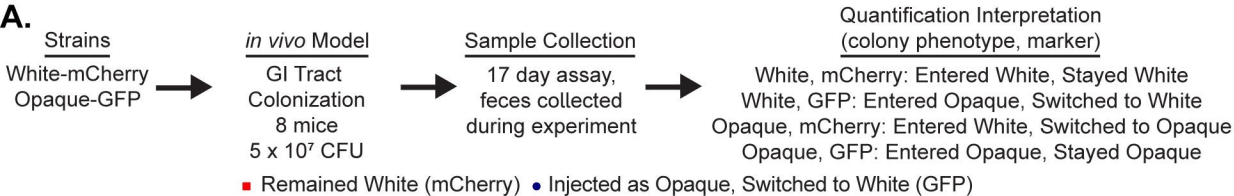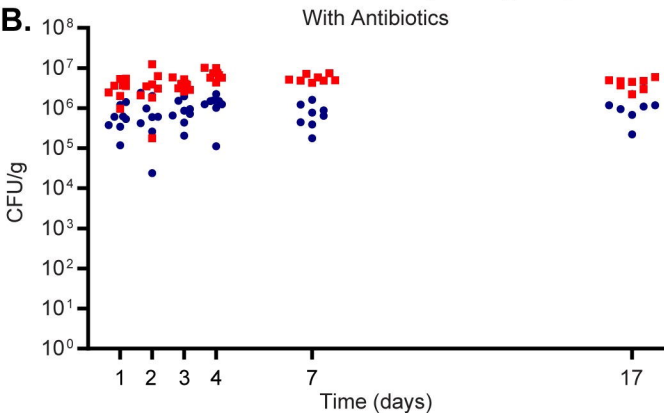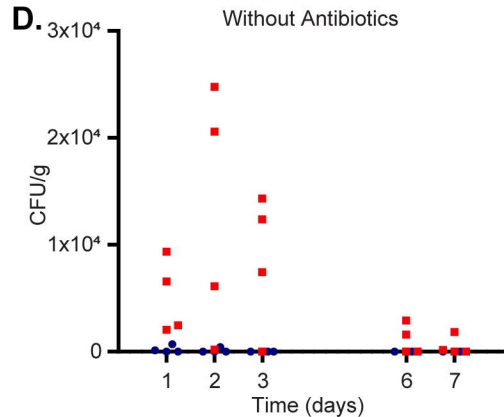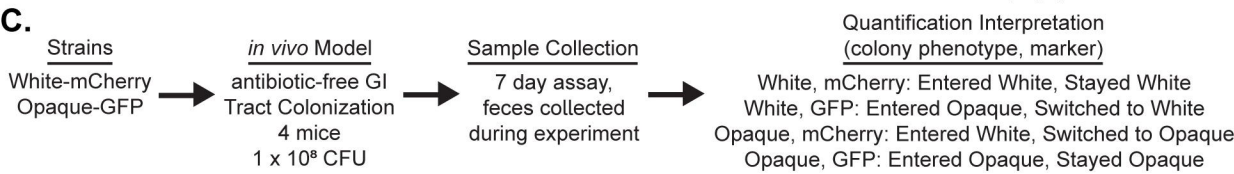

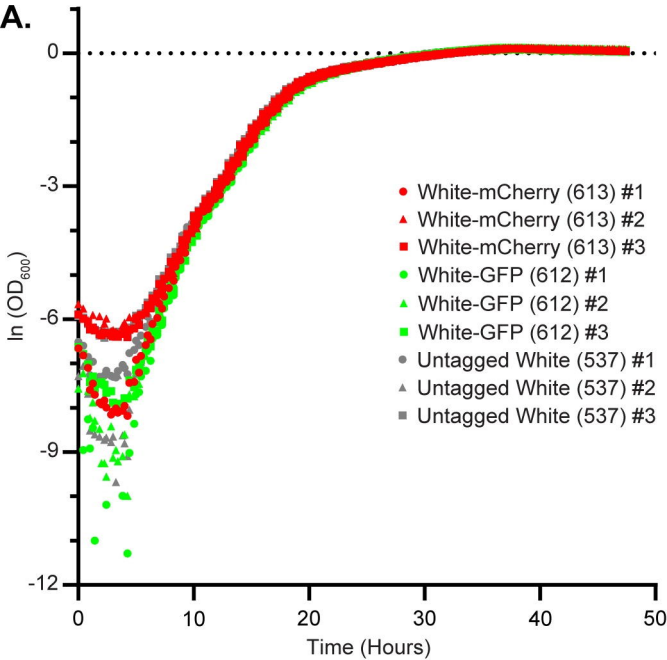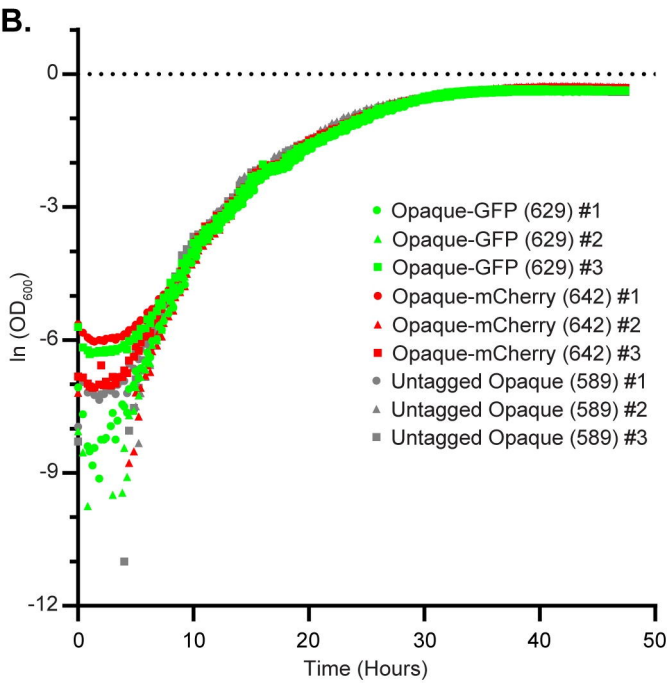



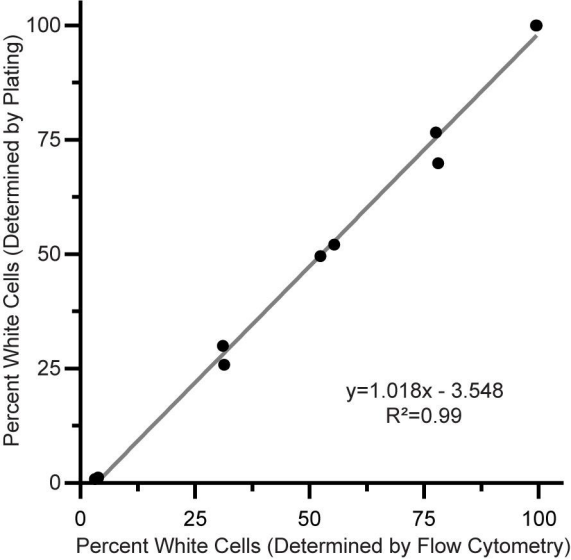

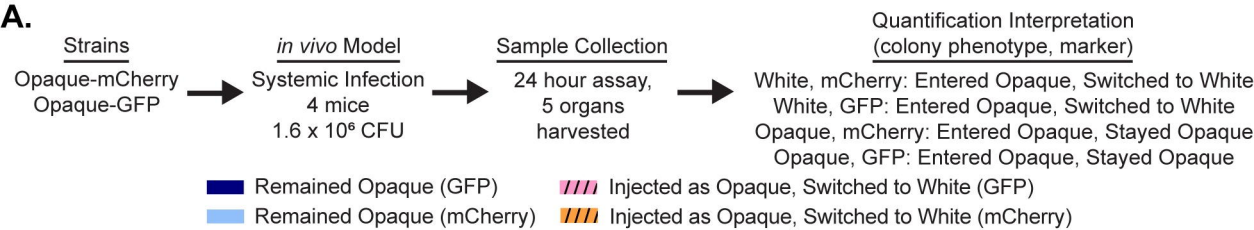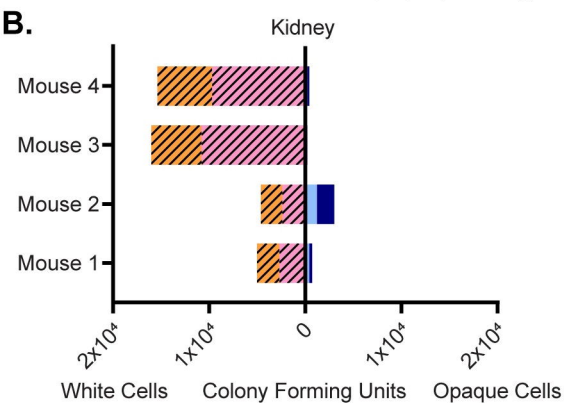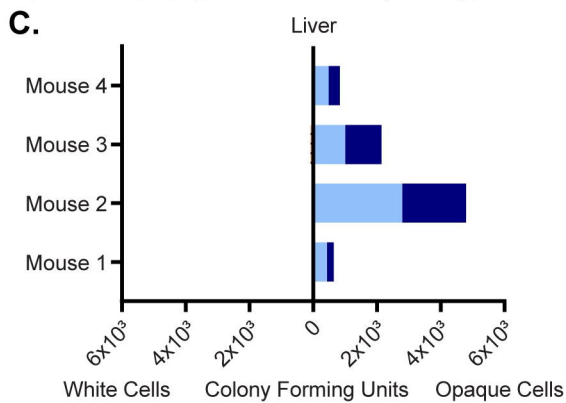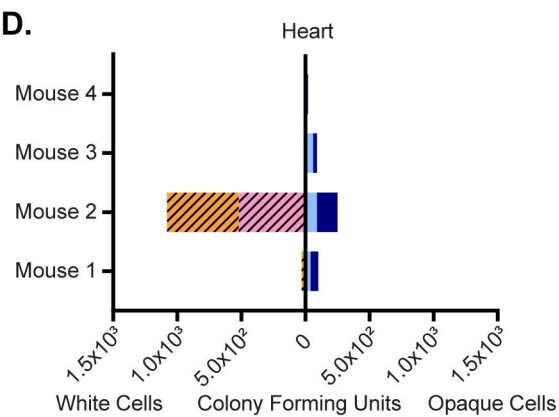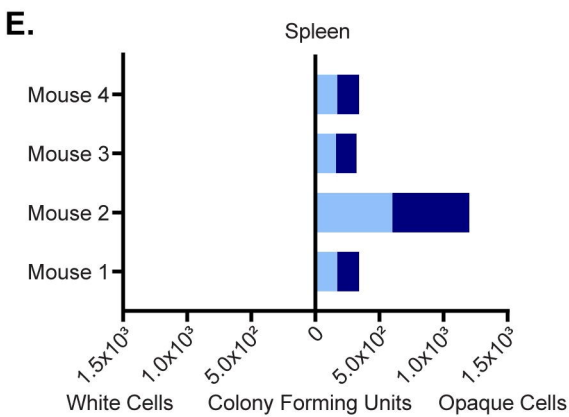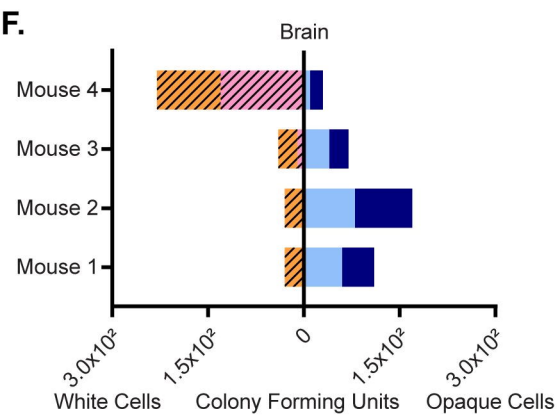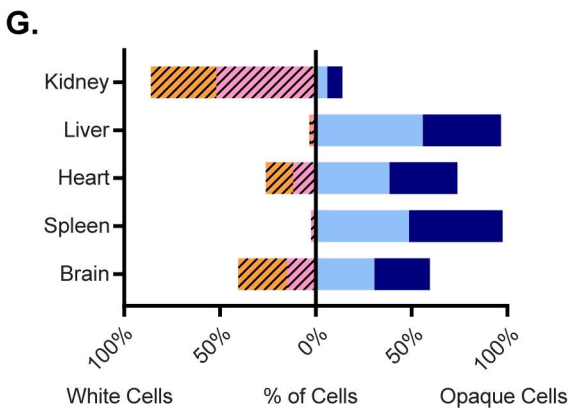

**A.**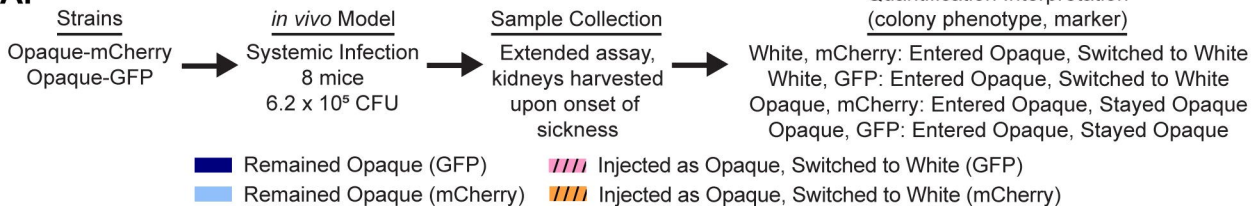**B.**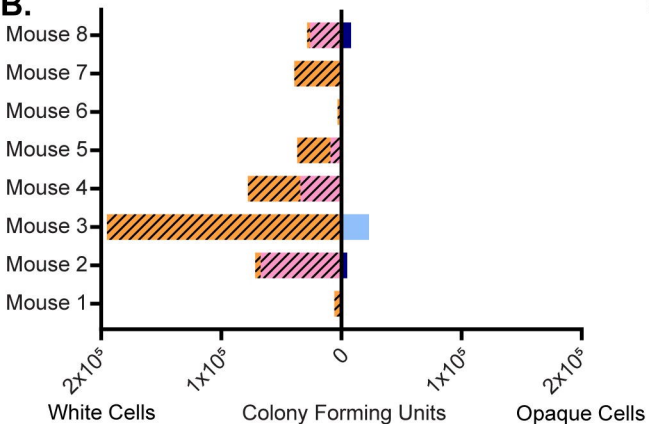**C.**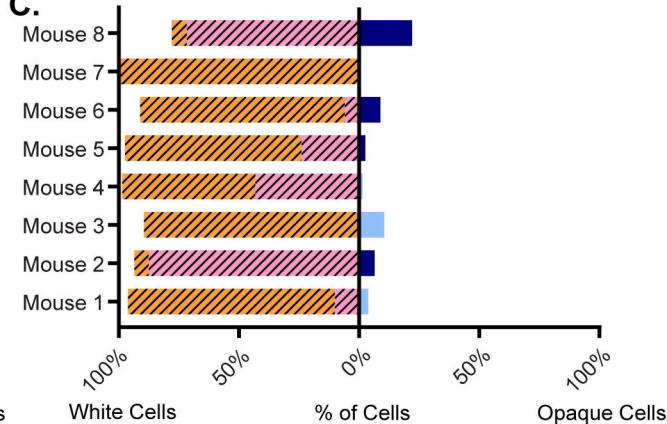

**A.**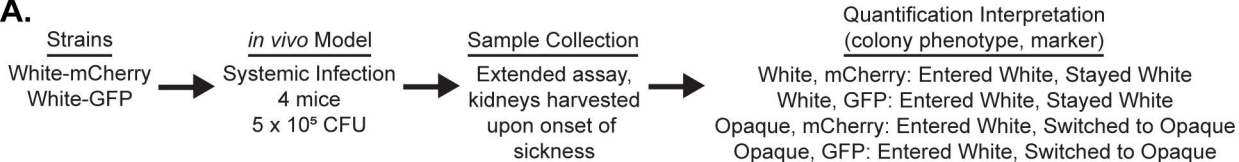

■ Remained White (GFP) ■ Remained White (mCherry)

**B.**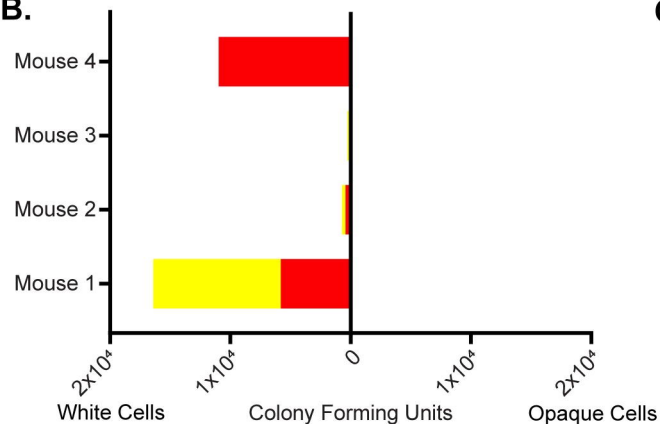**C.**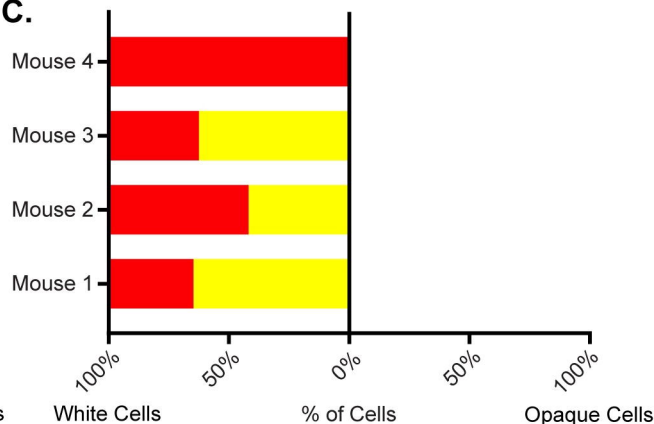

Source: http://biorxiv.org/content/10.1101/461293v4.full.pdf
